# Supplementary material for: Folding due to anisotropy in ice, from drill-core-scale cloudy bands to km-scale internal reflection horizons
Source: Copernicus journal article supplement (doi:10.5194/tc-19-5095-2025), 2025-10-27
Supplement: Supplementary file [file tc-19-5095-2025-supplement-title-page.pdf › tc-19-5095-2025-supplement-title-page.pdf]

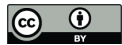

## *Supplement of*

# **Folding due to anisotropy in ice, from drill-core-scale cloudy bands to km-scale internal reflection horizons**

**Paul D. Bons et al.**

*Correspondence to:* Paul D. Bons (paul.bons@uni-tuebingen.de)

- tc-19-5095-2025-supplement-title-page.pdf
- .DS\_Store
- fold\_train\_traces
  - .DS\_Store
  - data fig 7b regular fold.txt
  - data fig 7c biotite schist.txt
  - data fig 7d Elle-VPFFT simulation.txt
  - data fig 9a cloudy bands.txt
  - data fig 9b IRH at EGRIP.txt
- supplement\_Elle\_VPFFT\_files
  - .DS\_Store
  - InputElleFile.elle
  - grainsRGBstep000.png
  - ice.sx
  - launch\_simulation.sh
  - phase\_db.txt
  - ppc.in

The copyright of individual parts of the supplement might differ from the article licence.
